# Supplementary material for: Cyclin-Dependent Kinase Inhibitors in Hematological Malignancies—Current Understanding, (Pre-)Clinical Application and Promising Approaches
Source: MDPI journal article supplement (doi:10.3390/cancers13102497), 2021-05-20
Supplement: s1 [file s1]

**Table 1.** Overview on recent preclinical and clinical application of CDK inhibitors in hematological malignancies as well as potential combination partners showing boosted effects.

| CDK inhibitor       | Target structure            | Entity                                         | Main mechanism                                                                      | Synergistic effects in combination with...                                                                                                                                                                                                     | Study type   |          | Ref.                                       |
|---------------------|-----------------------------|------------------------------------------------|-------------------------------------------------------------------------------------|------------------------------------------------------------------------------------------------------------------------------------------------------------------------------------------------------------------------------------------------|--------------|----------|--------------------------------------------|
|                     |                             |                                                |                                                                                     |                                                                                                                                                                                                                                                | pre-clinical | clinical |                                            |
| <b>palbociclib</b>  | CDK4/6                      | AML, B-ALL, CML, CLL, MCL, DLBCL, BL, ALCL, MM | Rb dephosphorylation, G1 arrest/senescence, apoptosis, autophagy                    | AML: sequential low-dose cytarabine, danusertib, MK-2206<br>ALL: FGFR1 inhibitor PD-173074, imatinib<br>MM: dexamethasone, bortezomid<br>CML: ponatinib<br>MCL: ibrutinib, PI3K inhibitors (re-sensitization)<br>MM: dexamethasone, bortezomib | ✓            | ✓        | 14, 17, 20-22, 25-30, 32, 33, 35-40, 42-45 |
| <b>ribociclib</b>   | CDK4/6                      | AML, ALL                                       | G1 arrest/senescence/apoptosis                                                      | ALL: dexamethasone, everolimus                                                                                                                                                                                                                 | ✓            | ✓        | 48, 49, 51                                 |
| <b>abemaciclib</b>  | CDK4/6                      | AML, MCL, DLBCL, MM                            | G1 arrest/senescence, autophagy, decreased MAPK and AKT pathway signaling           |                                                                                                                                                                                                                                                |              |          | 54-58                                      |
| <b>lerociclib</b>   | CDK4/6                      | AML, ALL, CML, BL                              | decreased Rb phosphorylation, G1 arrest                                             |                                                                                                                                                                                                                                                | ✓            |          | 59, 83                                     |
| <b>roniciclib</b>   | Pan-CDKs (CDK1/2/3/4/7/9)   | CLL, HL                                        |                                                                                     |                                                                                                                                                                                                                                                | ✓            | ✓        | 113                                        |
| <b>flavopiridol</b> | Pan-CDKs (CDK1/2/4/6/7/9)   | AML, ALL, CML, CLL, DLBCL                      | cell cycle arrest, MCL-1, BIM and NOXA reduction, ER stress-mediated death          | AML/MM: venetoclax/obatoclax<br>CML: pyrrolo-1,5-benzoxazepine compounds                                                                                                                                                                       | ✓            | ✓        | 79, 80, 82, 83, 86, 113                    |
| <b>voruciclib</b>   | Pan-CDKs (CDK1/2/4/5/6/8/9) | AML, CLL, FL, MCL, DLBCL, AML                  | Mcl-1 and c-Myc downregulation, caspase-3 and PARP-dependent apoptosis, JNK and p38 | AML: venetoclax                                                                                                                                                                                                                                | ✓            | ✓        | 61, 107                                    |

|                                                       |                            |                                                                |                                                                                             |                                                                                                                        |   |   |                                           |
|-------------------------------------------------------|----------------------------|----------------------------------------------------------------|---------------------------------------------------------------------------------------------|------------------------------------------------------------------------------------------------------------------------|---|---|-------------------------------------------|
|                                                       |                            |                                                                | phosphorylation, NOXA<br>induction                                                          |                                                                                                                        |   |   |                                           |
| <b>THZ1</b>                                           | CDK7/12/13                 | AML                                                            | apoptosis                                                                                   | MM: venetoclax or<br>carfilzomib                                                                                       | ✓ | ✓ | 75, 76                                    |
| <b>SY-1365</b>                                        | CDK7                       | AML                                                            | apoptosis                                                                                   | AML: venetoclax                                                                                                        | ✓ |   | 77                                        |
| <b>YKL-06-101</b>                                     | CDK8,<br>mTOR              | AML, ALL                                                       | growth inhibition                                                                           |                                                                                                                        |   |   | 73                                        |
| <b>SEL120-34A</b>                                     | CDK8/19                    | AML, MDS                                                       | growth inhibition                                                                           |                                                                                                                        | ✓ | ✓ | 74                                        |
| <b>atuveciclib</b>                                    | CDK9,<br>PTEFb, GSK3       | AML, MCL,<br>BL                                                | apoptosis                                                                                   | AML: venetoclax<br>MCL: metformin                                                                                      | ✓ |   | 66, 67, 128                               |
| <b>AZD4573</b>                                        | CDK9                       | AML, ALL,<br>MCL,<br>DLBCL, BL,<br>MM                          | Caspase activation, PARP<br>cleavage, MCL-1<br>suppression, XIAP down-<br>regulation        | AML/ALL/ DLBCL:<br>venetoclax<br>DLBCL: EZH2 inhibitors<br>EPZ6438 and GSK126                                          | ✓ | ✓ | 62                                        |
| <b>CDKI-73</b>                                        | CDK1, 2, 9                 | AML, ALL,<br>CLL,<br>DLBCL                                     | MCL-1 down-regulation,<br>apoptosis induction                                               | AML: venetoclax<br>CLL: fludarabine                                                                                    | ✓ | ✓ | 65                                        |
| <b>A-1592668</b>                                      | CDK9                       | AML, NHL                                                       | reduced RNA<br>polymerase II activity, loss<br>of MCL-1 protein,<br>apoptosis               | AML/NHL: venetoclax                                                                                                    | ✓ | ✓ | 70                                        |
| <b>LDC526</b>                                         | PTEFb/CDK9                 | CLL                                                            | Inhibited proliferation                                                                     |                                                                                                                        | ✓ |   | 68                                        |
| <b>dinaciclib</b>                                     | CDK1/2/5/9                 | MLL-<br>rearranged<br>AML, B-<br>and T-ALL,<br>CLL, MCL,<br>MM | Mcl-1 downregulation,<br>senescence                                                         | CLL: ibrutinib,<br>venetoclax, rituximab/<br>ofatumumab<br>MCL: orlistat<br>MM: doxorubicin, PARP<br>inhibitor ABT-888 | ✓ | ✓ | 47, 89, 91-93,<br>95-98, 100-<br>102, 106 |
| <b>AT7519<br/>(alternative<br/>name:<br/>AT7519M)</b> | CDK1/2/4/5/9<br>, GSK3β    | CLL, MCL,<br>MM                                                | apoptosis, inhibition of<br>RNA polymerase II and<br>GSK3b phosphorylation                  |                                                                                                                        | ✓ | ✓ | 103, 104, 106                             |
| <b>P276-00</b>                                        | CDK1/4/9                   | AML, MM                                                        | cell cycle arrest, caspase<br>activation, Rb<br>dephosphorylation, cyclin<br>downregulation | MM: bortezomib                                                                                                         | ✓ | ✓ | 109-112                                   |
| <b>TG02</b>                                           | CDK1/2/7/ 9,<br>JAK2, FLT3 | AML, MM                                                        | G1 arrest, ERK5 blockade,<br>intrinsic and extrinsic<br>apoptosis induction                 | MM: dexamethasone,<br>melphalan, bortezomib<br>lenalidomide                                                            | ✓ |   | 119-123                                   |

AML – acute myeloid leukemia, ALCL - Anaplastic large cell lymphoma, B-ALL – B- acute lymphoblastic leukemia, BL – burkitt lymphoma, CLL - chronic lymphoblastic leukemia, CML – chronic myeloid leukemia, DLBCL - Diffuse large B cell lymphoma, FL – follicular lymphoma, MCL - Mantle cell lymphoma, MDS - Myelodysplastic syndrome, MM – multiple myeloma, NHL – non-Hodgkin lymphoma, Rb – retinoblastoma
